# Supplementary material for: The influences of the structure of thiophene-based conjugated microporous polymers on the fluorescence sensing properties
Source: Royal Society of Chemistry journal article supplement (doi:10.1039/d0nj02912b), 2020-01-01
Supplement: d0nj02912b1.pdf [file d0nj02912b1.pdf]

## ***Supplementary Information***

***For***

### **The influences of the structure of thiophene-based conjugated microporous polymers on the fluorescence sensing properties**

Tong-Mou Geng\*, Chen Hu, Min Liu, Can Zhang, Heng Xu, and Xie Wang

*AnHui Province Key Laboratory of Optoelectronic and Magnetism Functional Materials;  
School of Chemistry and Chemical Engineering, Anqing Normal University, Anqing 246011,  
China*

#### **Corresponding Author:**

Tongmou Geng

Mailing Address: School of Chemistry and Chemical Engineering, Anqing Normal University,  
Anqing 246011, China

Telephone: +86-0556-5500090

Fax: +86-0556-5500090

E-mail addresses: gengtongmou@aqnu.edu.cn (TM Geng).

## **S1. Experimental Section**

### **S1.1. Materials**

Tetrakis-(triphenylphosphine) palladium (0) ( $\text{Pd}(\text{PPh}_3)_4$ ), cupric iodide were obtained from J&K Scientific. 2,3,4,5-tetraphenylthiophene (TPhTh), 1,3,5-triethynylbenzene (TEB), 1,4-diethynylbenzene (DEB), 2,3,4,5-tetrabromothiophene (TBrTh), diisopropylamine (DIPA), dimethylformamide (DMF), dichloromethane were purchased from Aladdin. All chemicals were used without any purified.

### **S1.2 Synthesis of 2,5-bis(4-bromophenyl)-3,4-diphenylthiophene (BBDTh)**

Admixture of  $\text{Br}_2$  (7.06 mmol, 1.13 g) and  $\text{CH}_2\text{Cl}_2$  (15 mL) was dropwise added into a mixture of 2,3,4,5-tetraphenylthiophene (3.53 mmol, 1.3715 g) and  $\text{CH}_2\text{Cl}_2$  (20 mL). The dropwise addition process lasts for 15 min., and the solution is brown-red, and stirred at room temperature for 16 hours. After 16 hours, the mixture was poured into 40 mL of absolute ethyl alcohol and a large amount of yellow precipitate was produced. The suction was then carried out and washed twice with methanol and finally dried under vacuum at 50 °C for 10 h. Yield was 83.6%. FT-IR ( $\text{cm}^{-1}$ ): 3343, 1636, 1477, 1390, 1072, 931, 701.  $^1\text{H}$  NMR (400 MHz,  $\text{CDCl}_3$ )  $\delta$  (ppm): 7.22, 7.32, 7.37, 7.48, 7.49. Elemental analysis of BBDTh: Calculated value (%): C 61.56, H 3.22, S 5.87; Found (%): C 61.06, H 3.153, S 5.748.

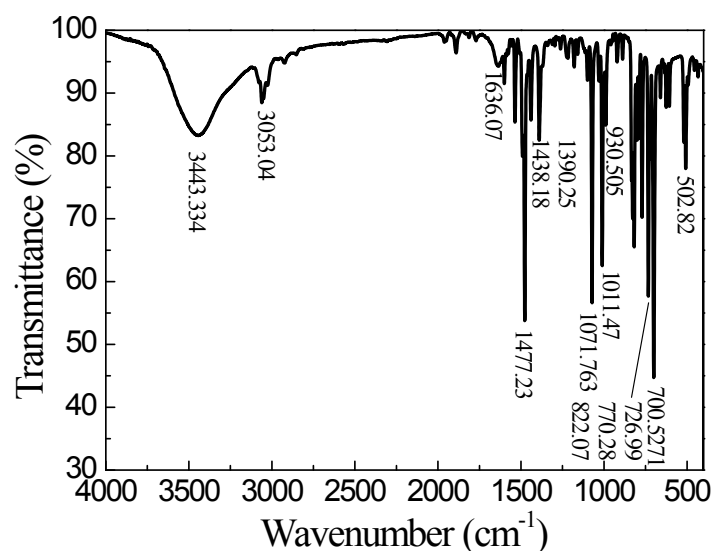

**Fig. S1.** FTIR spectrum of BBDTh.

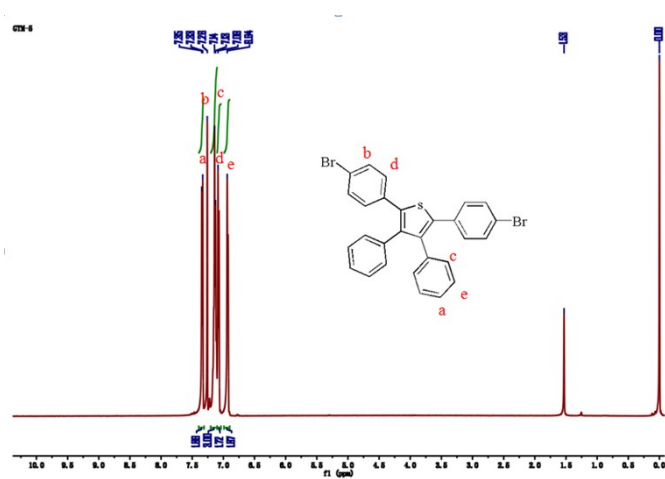

**Fig. S2.**  $^1\text{H}$  NMR spectra of BBDTh ( $\text{DCCl}_3$ ).

### S1.2. Synthesis of the CMPs

**TTPTTh:** A mixture of 2,5-bis(4-bromophenyl)-3,4-diphenylthiophene (BBDTh) (2.0 mmol, 1.0930 g), 1,3,5-triethynylphenyl (2.0 mmol, 0.3006 g), tetrakis(triphenylphosphine) palladium (0) ( $\text{Pd}(\text{PPh}_3)_4$ ) (20 mg),  $\text{CuI}$  (20 mg), (12.4 mL), and DIPA (12.4 mL) react in nitrogen in an atmosphere of 100 °C. The solution is brown red. Three days later, the reaction stopped. After cooling at room temperature, the solid was washed three times with methanol (10 mL) and chloroform (10 mL) for

each, then the product was extracted with methanol, chloroform and acetone for 24 hours using a Soxhlet extractor, respectively. The solid was dried at 50 °C in a vacuum oven for 24 h to afford brown powder (Yield was 62.72 %). FT-IR ( $\text{cm}^{-1}$ ): 3442, 1636, 1384, 698. ss  $^{13}\text{C}$  NMR (400 MHz)  $\delta$  (ppm): 135.97, 130.33, 127.55, 90.19, 82.00, 76.96. Elemental analysis of TTPTTh: Calculated value (%): C 88.98, H 4.22, S 6.60; Found (%): C 87.50, H 4.465, S 6.895.

**DBTh:** This polymer was synthesized using the similar procedures as described for TTPTTh. 2,3,4,5-tetrabromothiophene (1.0 mmol, 0.3997 g), 1,3,5-triethynylbenzene (TEB) (3 mmol, 0.3784 g), tetrakis-(triphenylphosphine) palladium(0) ( $\text{Pd}(\text{PPh}_3)_4$ ) (40 mg), CuI (20 mg), DMF (8 mL), and DIPA (8 mL) were used. DBTh was obtained as a brown powder (0.5157 g, yield: 81.57 %) IR (KBr,  $\nu$ ;  $\text{cm}^{-1}$ ): 3445, 2202, 1657, 1504, 1461, 1396, 834, and 545. ss  $^{13}\text{C}$  NMR (400 MHz)  $\delta$  (ppm): 130.77, 122.08, 98.80, 82.87, 76.96. Elemental analysis of DBTh: Calculated value (%): C 86.72, H 3.64, S 9.65; Found (%): C 84.32, H 4.916, S 9.764.

**TBTh:** This polymer was synthesized using the similar procedures as described for TTPTTh. 2,3,4,5-tetrabromothiophene (1.0 mmol, 0.3997 g), 1,3,5-triethynylbenzene (TEB) (2 mmol, 0.3004 g), tetrakis-(triphenylphosphine) palladium(0) ( $\text{Pd}(\text{PPh}_3)_4$ ) (40 mg), CuI (20 mg), DMF (8 mL), and DIPA (8 mL) were used. TBTh was obtained as a brown powder (0.5012 g, yield: 73.15 %). IR (KBr,  $\nu$ ;  $\text{cm}^{-1}$ ): 3429, 3298, 2198, 1646, 1576, 1412, 1308, 822, and 632. ss  $^{13}\text{C}$  NMR (400 MHz)  $\delta$  (ppm): 132.60, 122.26, 96.11, 80.56. Elemental analysis of TBTh: Calculated value (%): C 85.69, H 2.88, S 11.44; Found (%): C 83.34, H 2.934, S 11.726.

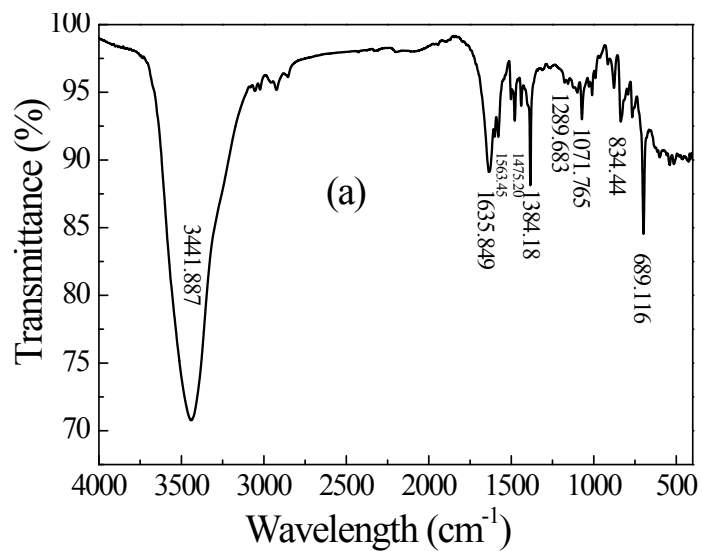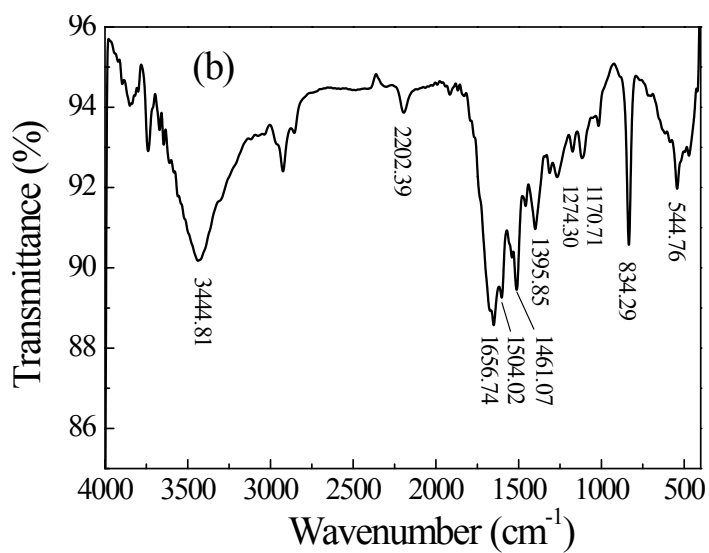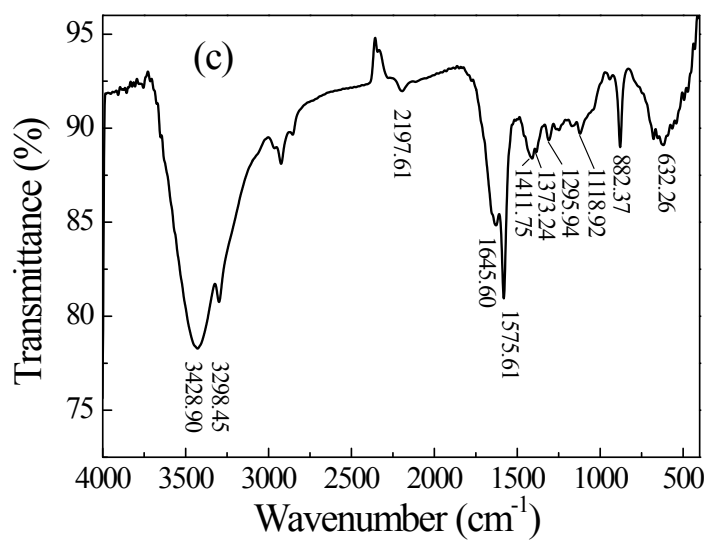

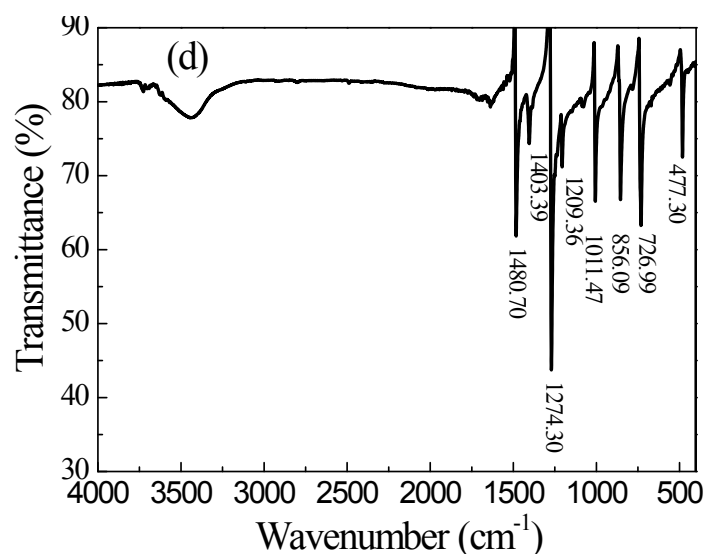

**Fig. S3.** FT-IR spectra of CMPs and monomer. (a) TTPTh, (b) DBTh, (c) TBTh, and (d) TBrTh.

### S1. 3. Methods

Infrared spectra were recorded on an iS50 FT-IR spectrometer (400 to 4000 cm<sup>-1</sup>) by using KBr pellets. Solid-state <sup>13</sup>C CP/MAS NMR measurements were recorded on a Bruker AVANCE III 400 WB spectrometer at a MAS rate of 5 kHz and a CPcontact time of 2 ms. UV-Vis spectra were recorded on an UV-2501PC spectrometer. Elemental analyses were carried out on a VARIO ELIII cube analyzer. Scanning electron microscopy was performed on a S-3400N microscope. Thermogravimetric analysis (TGA) measurements were performed on a CDR-4P TGA under N<sub>2</sub>, by heating to 800 °C at a rate of 10 °C min<sup>-1</sup>. X-ray diffraction (XRD) data were recorded on a XRD 600 diffractometer by depositing powder on glass substrate, from 2θ = 5° to 90° with 0.02° increment. The Brunauer-Emmett-Teller (BET) method was utilized to calculate specific surface area and pore volume, the Saito-Foley (SF) method was applied for estimation of pore size distribution. Fluorescence spectra were recorded at room temperature using a Hitachi F-4500 spectrophotometer.

Samples were prepared as follows: dried CMPs powder (10 mg) ground with an agate mortar was added to 10 mL of organic solvents. After the resulting mixture was well dispersed with ultrasound, the dispersion colloid was obtained.

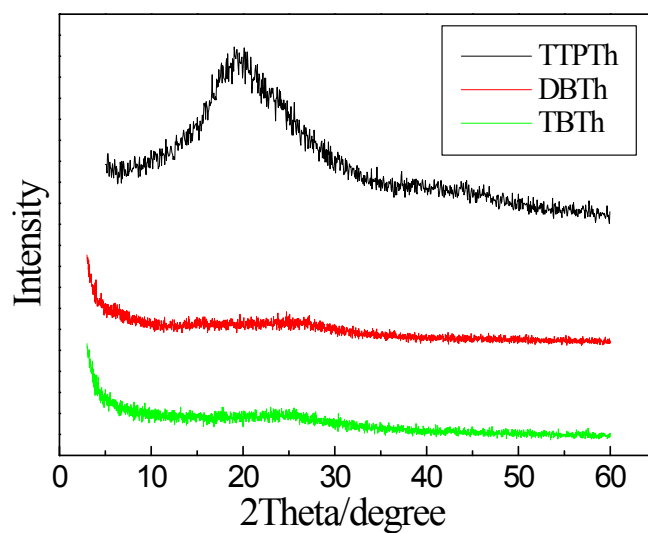

**Fig. S4.** PXRD patterns of TTPTTh, DBTh, and TBTh.

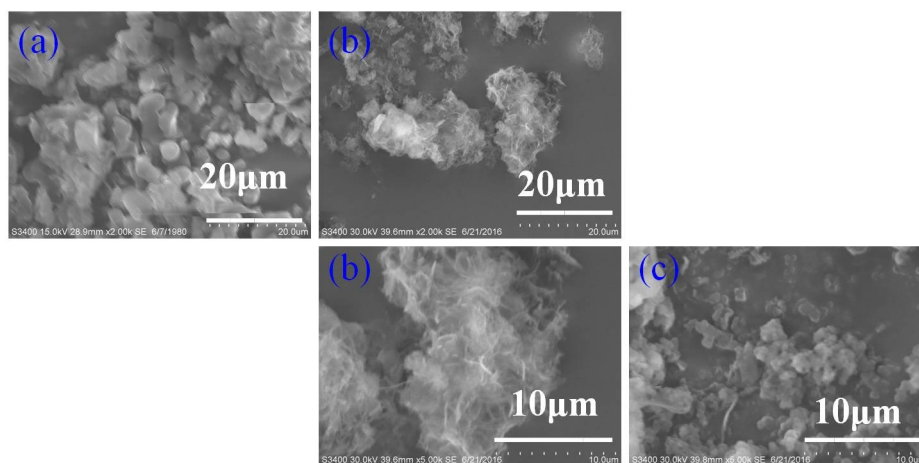

**Fig. S5.** The SEM images of (a) TTPTTh, (b) DBTh, and (c) TBTh.

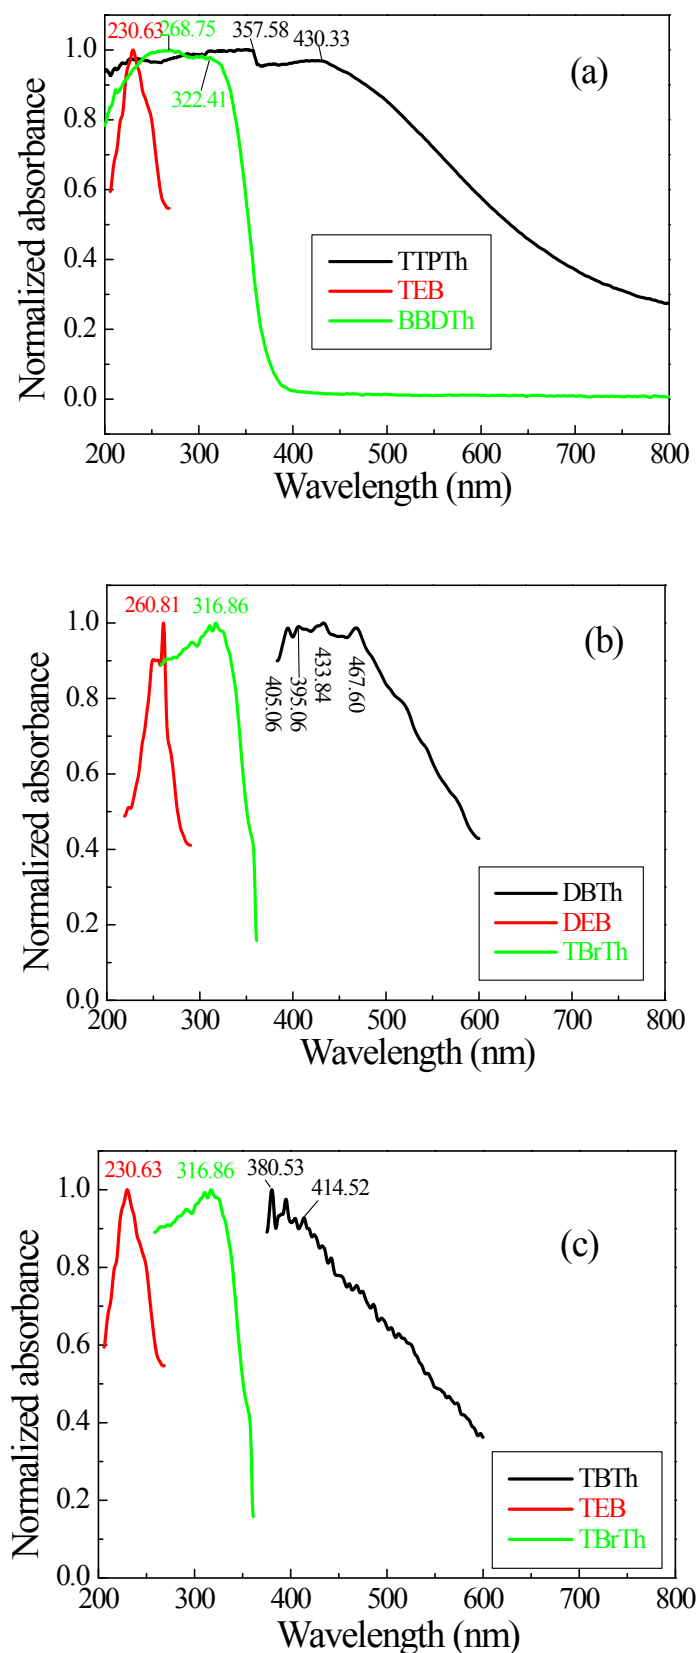

**Fig. S6.** UV-Vis spectra of CMPs and the corresponding monomers: (a) TTPTh, (b) DBTh, and (c) TBTh.



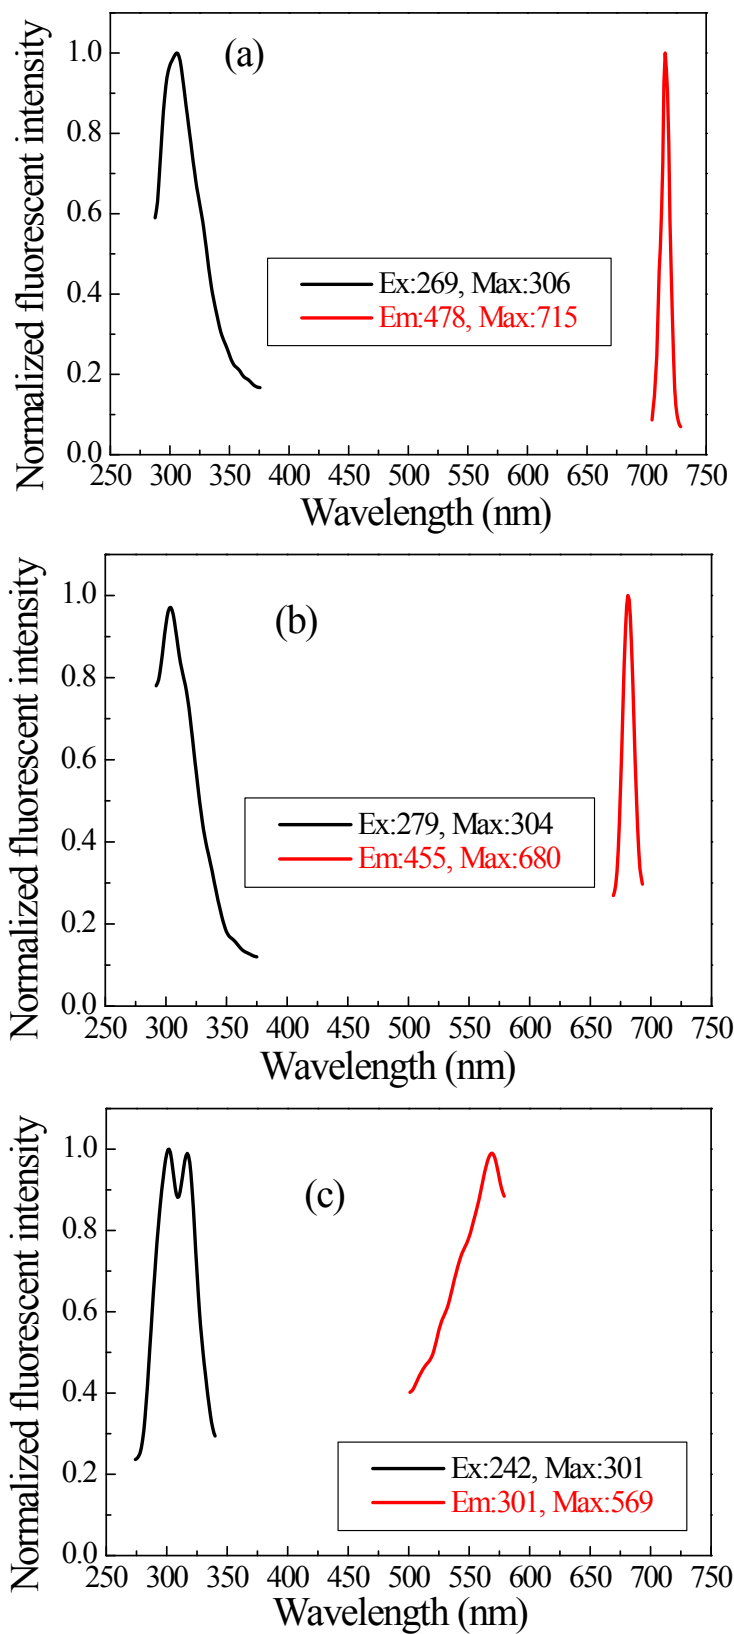

**Fig. S7.** The excitation (black line) and fluorescence spectra (red line) of three solid CMPs: (a) TTPTTh, (b) DBTh, and (c) TBTh.

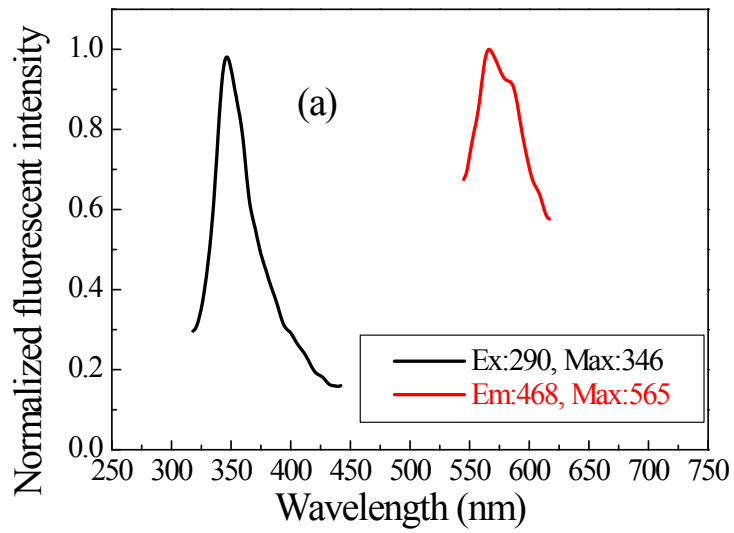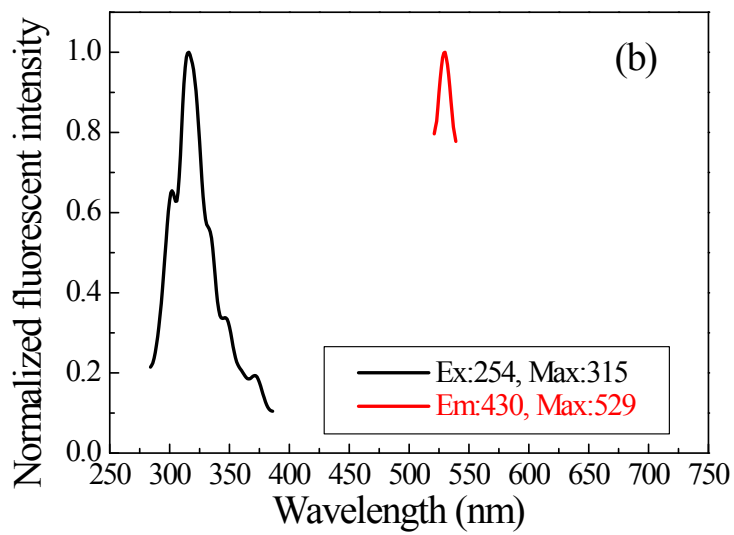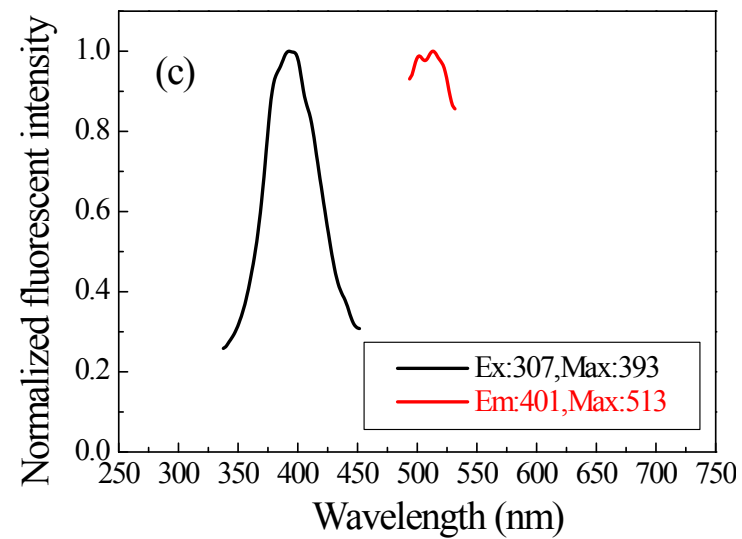

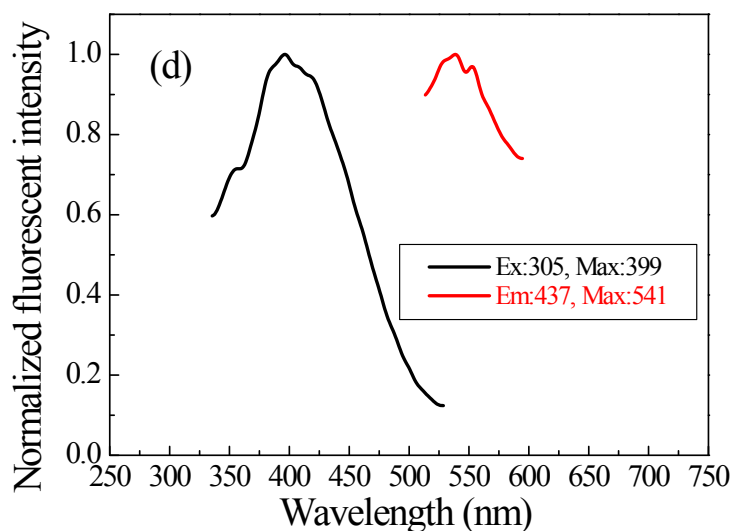

**Fig. S8.** The excitation (black line) and fluorescence spectra (red line) of solid monomers (a) TEB, (b) DEB, (c) BBDTh, as well as (d) model compound tetraphenylthiophene (TPTh).

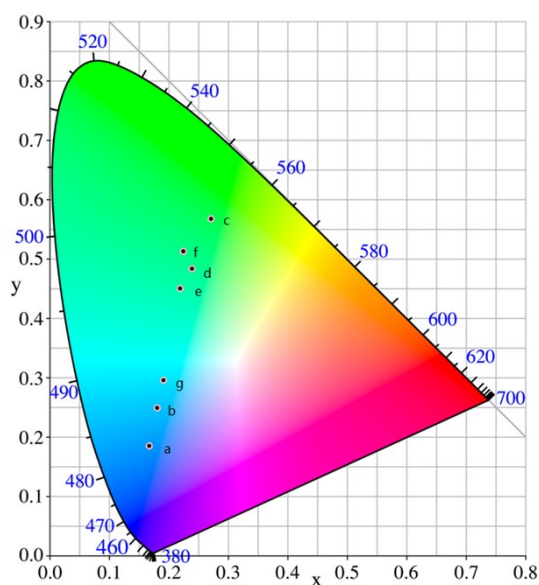

**Fig. S9.** CIE chromaticity diagram of DBTh under ambient condition in various solvents: a) ACN, b) Acetone, c) DMF, d) DOX, e) Chloroform, f) THF, and g) EtOH ( $\lambda_{ex}=410$  nm).

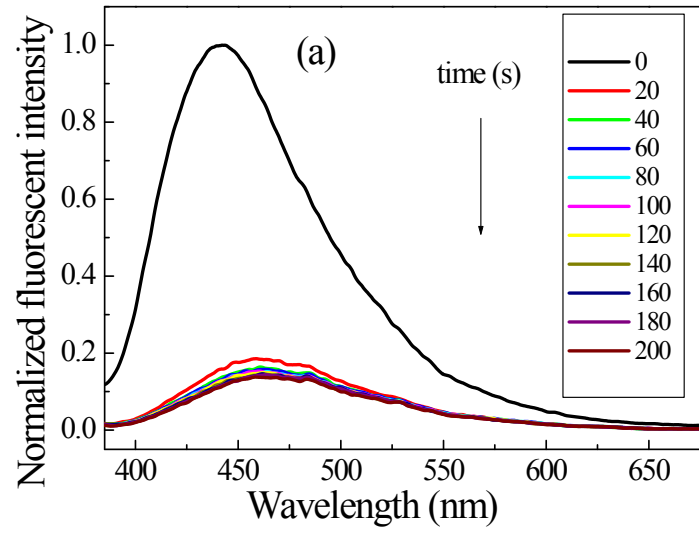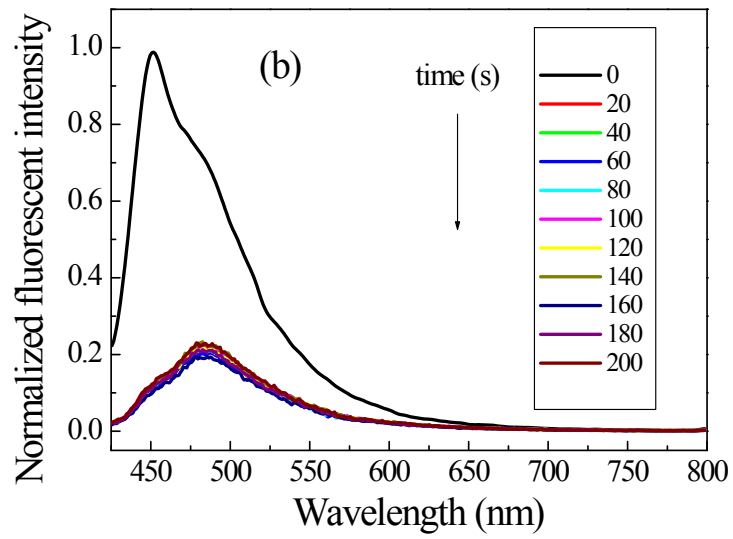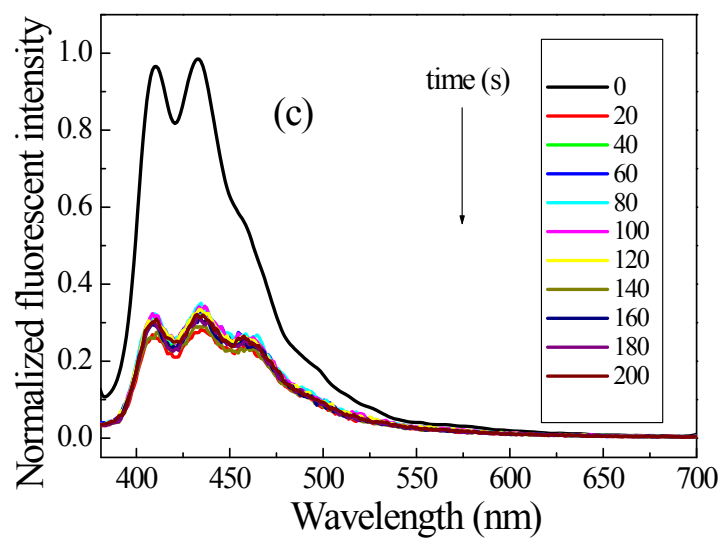

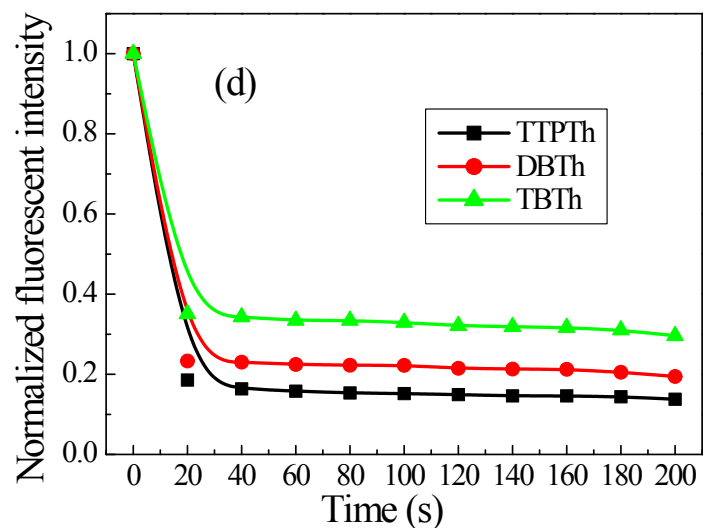

**Fig. S10.** Normalized fluorescence spectra of the CMPs dispersed solution upon addition of NACs. (a) TTPTh (DNP:  $5.0 \times 10^{-4}$  mol L<sup>-1</sup>, in chloroform,  $\lambda_{ex}=360$  nm), (b) DBTh (DNP:  $1.5 \times 10^{-4}$  mol L<sup>-1</sup>, in DMF,  $\lambda_{ex}=410$  nm), and (c) TBTh (DNP:  $2.0 \times 10^{-4}$  mol L<sup>-1</sup>, in THF,  $\lambda_{ex}=362$  nm) for different periods of time. (d) Normalized fluorescence intensity of the CMPs dispersed solution upon addition of DNP.

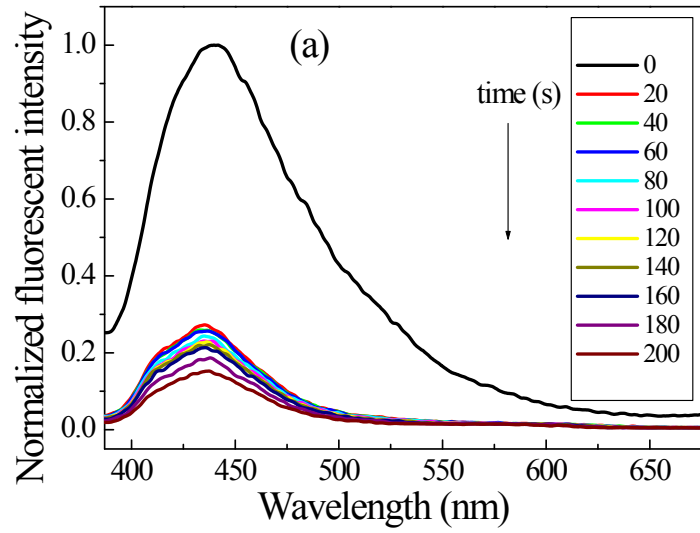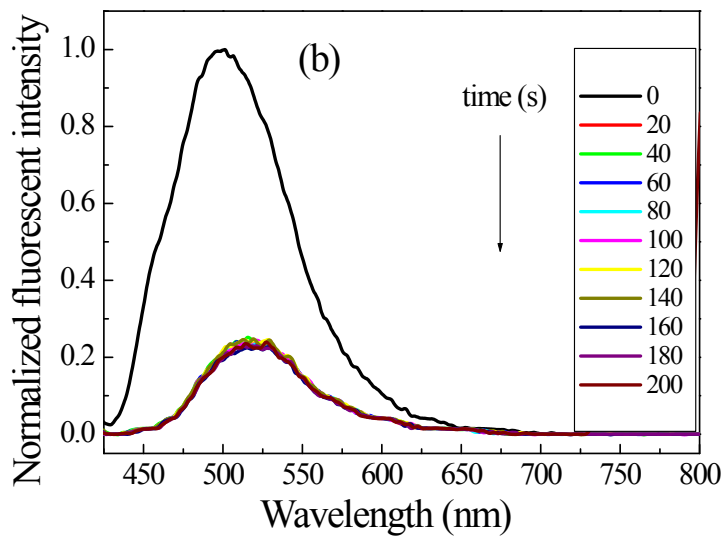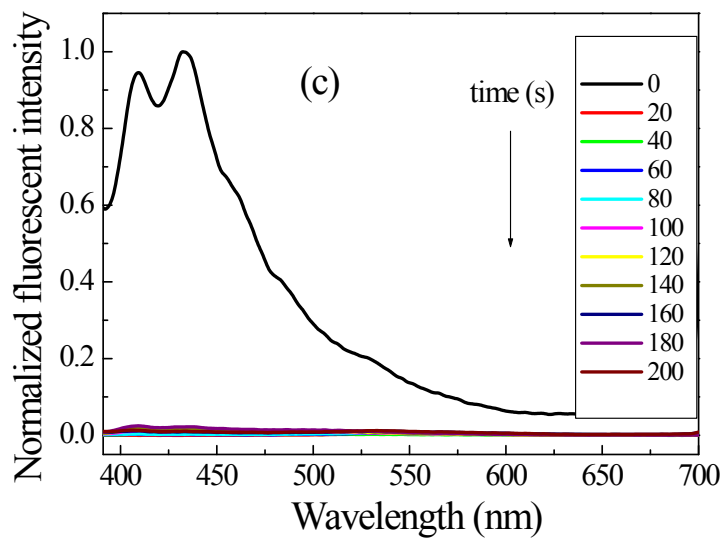

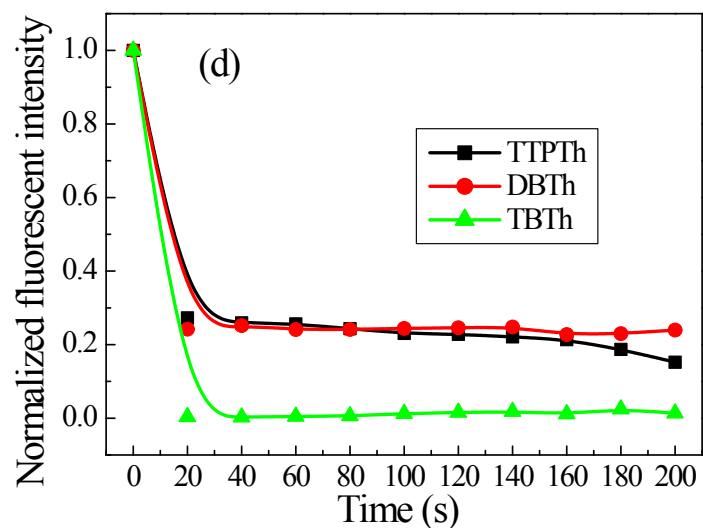

**Fig. S11.** Normalized fluorescence spectra of the CMPs dispersed solution upon addition of  $I_2$ . (a) TTPTh ( $I_2$ :  $1.0 \times 10^{-3}$  mol  $L^{-1}$ , in chloroform,  $\lambda_{ex}=360$  nm), (b) DBTh ( $I_2$ :  $5.0 \times 10^{-3}$  mol  $L^{-1}$ , in DMF,  $\lambda_{ex}=410$  nm), and (c) TBTh ( $I_2$ :  $1.0 \times 10^{-4}$  mol  $L^{-1}$ , in THF,  $\lambda_{ex}=362$  nm) for different periods of time. (d) Normalized fluorescence intensity of the CMPs dispersed solution upon addition of  $I_2$ .

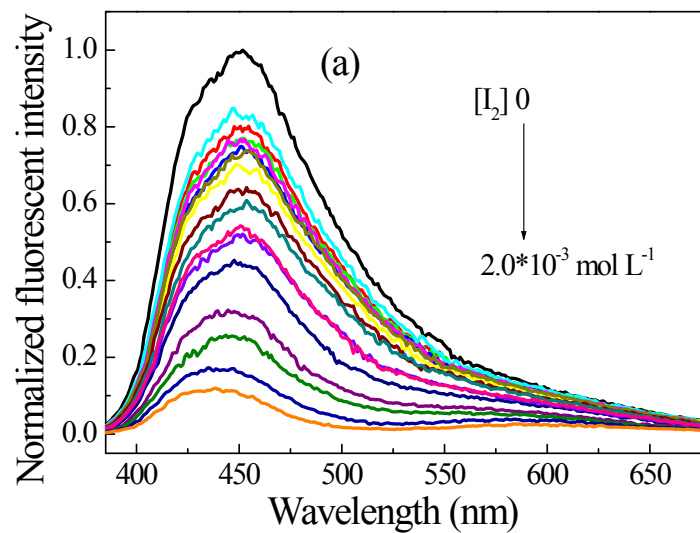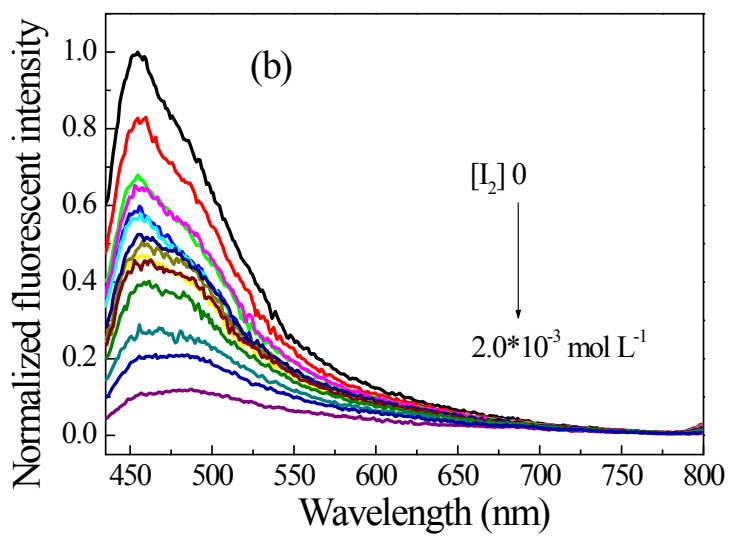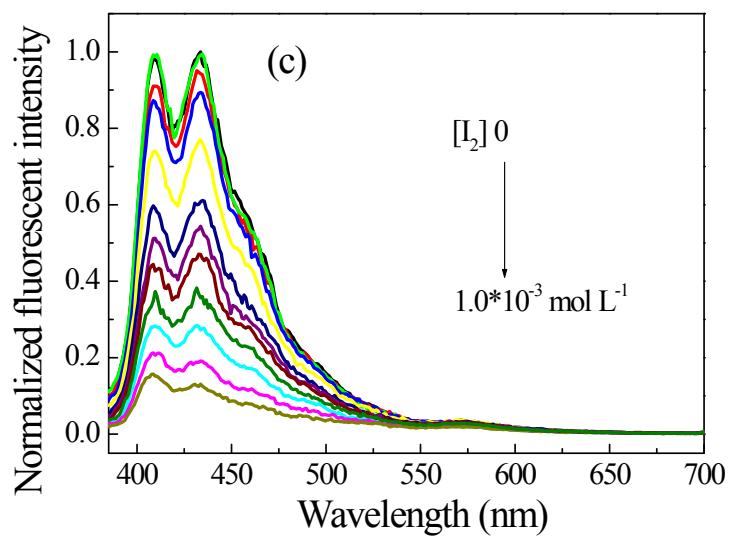



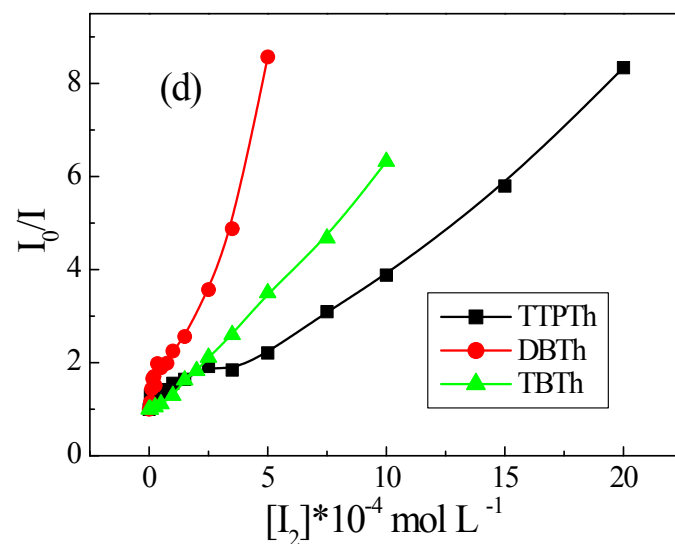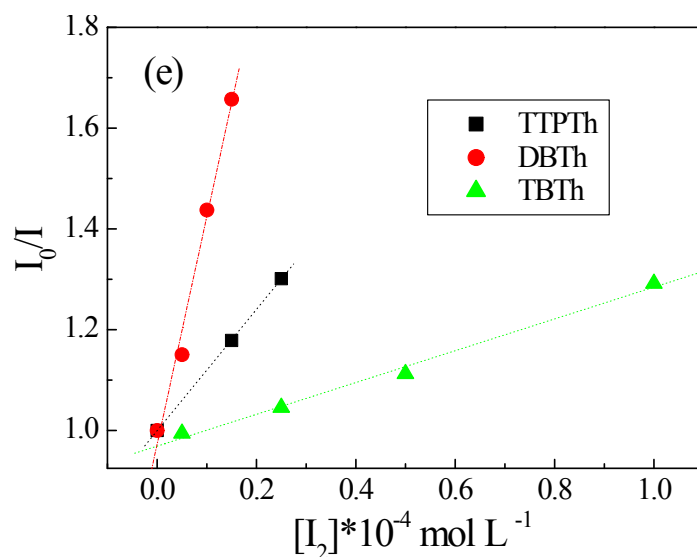

**Fig. S12.** The changes of fluorescent spectra of (a) TTPTh, (b) DBTh, and (c) TBTh in chloroform, DMF, and THF upon addition of I<sub>2</sub>; (d) Relative fluorescence intensity (I<sub>0</sub>/I) of the TTPTh, DBTh, and TBTh in suspensions upon addition of various concentrations of I<sub>2</sub>; (e) Stern–Volmer plots of TTPTh, DBTh, and TBTh with various concentrations of I<sub>2</sub> (1.0 mg mL<sup>-1</sup>, excited at 360, 410, and 362 nm).

**Table S1.** The equation of  $I_0/I$  of the CMPs to the concentrations of DNP or  $I_2$  for suspension in chloroform (TTPTh), DMF (DBTh), and THF (TBTh).

| CMPs  | The equation                               | Regression coefficient (R) | The concentration range of NACs or $I_2$ (mol L <sup>-1</sup> ) | detection limit (mol L <sup>-1</sup> ) |
|-------|--------------------------------------------|----------------------------|-----------------------------------------------------------------|----------------------------------------|
| TTPTh | $I_0/I=0.9913+1.10\times 10^4[\text{DNP}]$ | 0.9974                     | 0 to $1.0\times 10^{-4}$                                        | $5.47\times 10^{-10}$                  |
| DBTh  | $I_0/I=1.0062+5.76\times 10^4[\text{DNP}]$ | 0.9996                     | 0 to $1.5\times 10^{-5}$                                        | $1.56\times 10^{-10}$                  |
| TBTh  | $I_0/I=0.9502+9.59\times 10^3[\text{DNP}]$ | 0.9991                     | $5.0\times 10^{-6}$ to $1.0\times 10^{-4}$                      | $9.38\times 10^{-9}$                   |
| TTPTh | $I_0/I=0.9972+1.20\times 10^4[I_2]$        | 0.99997                    | 0 to $2.5\times 10^{-5}$                                        | $1.74\times 10^{-8}$                   |
| DBTh  | $I_0/I=0.9725+4.52\times 10^4[I_2]$        | 0.9937                     | 0 to $1.5\times 10^{-5}$                                        | $3.32\times 10^{-12}$                  |
| TBTh  | $I_0/I=0.9691+3.15\times 10^3[I_2]$        | 0.9965                     | $5.0\times 10^{-6}$ to $1.0\times 10^{-4}$                      | $1.66\times 10^{-9}$                   |

**Table S2.** Summary of  $K_{sv}$  and LODs of thiophene-based CMPs for fluorescence sensing to NACs and iodine.

| CMPs    | Analyte      | $K_{sv}$<br>(mol L <sup>-1</sup> )                       | detection<br>limit<br>(mol L <sup>-1</sup> )   | Refs                                                         |
|---------|--------------|----------------------------------------------------------|------------------------------------------------|--------------------------------------------------------------|
| PTPATTh | PA           | 1.17×10 <sup>3</sup> (DOX)<br>5.00×10 <sup>3</sup> (THF) | 6.39×10 <sup>-8</sup><br>3.01×10 <sup>-9</sup> | <i>Sensor. Actuat. B-Chem.</i> 2017, 244,<br>334–343.        |
| TTPT    | o-NP         | 6.20×10 <sup>3</sup>                                     | 2.18×10 <sup>-9</sup>                          | <i>Polym. Chem.</i> 2018, 9, 777–784.                        |
| PTThP-2 | iodine       | 1.99×10 <sup>3</sup>                                     | 7.54×10 <sup>-8</sup>                          | <i>J. Polym. Res.</i> 2019, 26, 113–122.                     |
| PTThP-3 |              | 5.09×10 <sup>3</sup>                                     | 2.95×10 <sup>-8</sup>                          |                                                              |
| PTPTB   | <i>p</i> -AP | 7.08×10 <sup>4</sup>                                     | 4.2×10 <sup>-6</sup>                           | <i>Polym. Chem.</i> 2018, 9(27), 3832–<br>3839.              |
| SNPs    | NB           | -                                                        | -                                              | <i>Angew. Chem. Int. Edit.</i> 2018,<br>57(43), 14188–14192. |
| SN-1    | PA           | 2.78×10 <sup>4</sup>                                     | -                                              | <i>ACS Appl. Bio Mater.</i> 2018, 1,<br>473–479.             |
| SN-2    | PA           | 1.31×10 <sup>4</sup>                                     | -                                              |                                                              |
| TTPTTh  | DNP          | 1.10×10 <sup>4</sup>                                     | 5.47×10 <sup>-10</sup>                         | <i>This work.</i>                                            |
| DBTh    | DNP          | 5.76×10 <sup>4</sup>                                     | 1.56×10 <sup>-10</sup>                         |                                                              |
| TBTh    | DNP          | 9.59×10 <sup>3</sup>                                     | 9.38×10 <sup>-9</sup>                          |                                                              |
| TTPTTh  | iodine       | 1.20×10 <sup>4</sup>                                     | 1.74×10 <sup>-8</sup>                          |                                                              |
| DBTh    | iodine       | 4.52×10 <sup>4</sup>                                     | 3.32×10 <sup>-12</sup>                         |                                                              |
| TBTh    | iodine       | 3.15×10 <sup>3</sup>                                     | 1.66×10 <sup>-9</sup>                          |                                                              |

*p*-AP—*p*-nitroaniline

**Table S3.** Summary of  $K_{sv}$  and LODs of other materials for determination of DNP.

| materials                 | BET<br>( $m^2 g^{-1}$ ) | Methods or<br>$K_{sv}$ ( $L mol^{-1}$ )   | detection limit<br>( $mol L^{-1}$ )               | Refs                                                          |
|---------------------------|-------------------------|-------------------------------------------|---------------------------------------------------|---------------------------------------------------------------|
| -                         | -                       | SPE and UHPLC<br>-QTR AP® MS              | $1.85 \times 10^{-10}$<br>(34 ng/l)               | <i>Anal. Bioanal. Chem.</i> , 2013,<br>405, 5875–5885.        |
| SBA-15 CMK-<br>3          | 660<br>1400             | CMK-3-GC<br>-MS method                    | $1.09 \times 10^{-8}$<br>(0.002 $\mu g mL^{-1}$ ) | <i>Anal. Chim. Acta</i> , 2011, 695,<br>58–62.                |
| GO-MIP/GCE<br>composites  | -                       | electrochemical<br>sensor                 | $4 \times 10^{-7}$<br>(0.4 $\mu M$ )              | <i>Sensor. Actuat. B-Chem.</i> ,<br>2012, 171–172, 1151–1158. |
| SPE-MIPs                  | -                       | fluorescence<br>detection                 | $1 \times 10^{-9}$<br>(1 nmol/L)                  | <i>Chinese Chem. Lett.</i> , 2014,<br>25, 1492–149.           |
| Dialysed<br>caramel       | -                       | fluorescence<br>detection                 | $1.4 \times 10^{-7}$<br>(0.14 $\mu M$ )           | <i>Talanta</i> , 2019, 197, 159–<br>167.                      |
| MOFs                      | -                       | -                                         | -                                                 | <i>J. Mater. Chem. A</i><br>2015, 3, 22369–22376.             |
| proximate<br>pyrene units | -                       | fluorescence<br>detection $1 \times 10^4$ | -                                                 | <i>Tetrahedron Lett.</i> , 2015, 56,<br>2311–2314.            |
| TTPTh                     | 564.97                  | $1.10 \times 10^4$                        | $5.47 \times 10^{-10}$                            | <i>This work.</i>                                             |
| DBTh                      | 416.99                  | $5.76 \times 10^4$                        | $1.56 \times 10^{-10}$                            |                                                               |
| TBTh                      | 521.30                  | $9.59 \times 10^3$                        | $9.38 \times 10^{-9}$                             |                                                               |

**Table S4.** Summary of  $K_{sv}$  and LODs of POPs for fluorescence sensing to iodine

| Sample   | BET              | $K_{sv}$           | LOD                      | Refs                                                            |
|----------|------------------|--------------------|--------------------------|-----------------------------------------------------------------|
|          | ( $m^2 g^{-1}$ ) | ( $L mol^{-1}$ )   | ( $mol L^{-1}$ )         |                                                                 |
| TTPA     | 308              | $2.38 \times 10^4$ | $3.22 \times 10^{-11}$   | <i>Micropor. Mesopor. Mat.</i> 2019,                            |
| TTDATA   | 491              | $4.33 \times 10^2$ | -                        | 273, 163–170                                                    |
| TTMDATA  | 456              | $7.31 \times 10^2$ | -                        |                                                                 |
| TS-TAD   | 828,             | $5.76 \times 10^3$ | $1.56 \times 10^{-9}$    | <i>Eur. Polym. J.</i> 2019,                                     |
| TS-TADP  | 783              | $5.59 \times 10^3$ | $8.05 \times 10^{-11}$   | 115, 37–44                                                      |
| Cz-TPM   | 713.2            | 2372(I)            | -                        | <i>ACS Appl. Mater. Interfaces</i><br>2017, 9 (25), 21438–21446 |
| PTThP-2, | 370.8            | $1.99 \times 10^3$ | $7.54 \times 10^{-8}$    | <i>J. Polym. Res.</i> 2019, 26, 113–                            |
| PTThP-3  | 748.2            | $5.09 \times 10^3$ | $2.95 \times 10^{-8}$    | 122.                                                            |
| TTTAT    | 564.8            | $1.53 \times 10^5$ | $2.98 \times 10^{-12}$ , | <i>Micropor. Mesopor. Mat.</i> 2019,                            |
| TTDAT    | 44.1             | $9.07 \times 10^4$ | $2.96 \times 10^{-13}$   | 284, 468–475.                                                   |
| TDPA     | 56.52            | $1.85 \times 10^4$ | $1.62 \times 10^{-11}$   | <i>J. Appl. Polym. Sci.</i>                                     |
| TTPBTA   | 2.486            | $6.56 \times 10^4$ | $6.86 \times 10^{-12}$   | 2019, 49255.                                                    |
| TDPDB    | 592.18           | $5.83 \times 10^4$ | $2.57 \times 10^{-12}$   | <i>Polym. Adv. Technol.</i> 2020,<br>31(6), 1388-1394.          |
| TDP      | 261.9            | $6.10 \times 10^4$ | $3.14 \times 10^{-13}$   | <i>New J. Chem.</i> , 2020, 44, 2312-                           |
| PCPP     | 43.0             | $1.40 \times 10^5$ | $2.46 \times 10^{-12}$   | 2320.                                                           |
| TTPDP    | 187.5            | $2.02 \times 10^4$ | $2.25 \times 10^{-12}$   |                                                                 |
| TDTPAP   | 695.2            | $4.65 \times 10^3$ | $3.25 \times 10^{-10}$   |                                                                 |
| TDTPAPz  | 561.3            | $3.76 \times 10^3$ | $2.47 \times 10^{-11}$   | <i>Environ. Sci. Pollut. Res.</i>                               |
| TTDPz    | 13.5             | $1.10 \times 10^3$ | $1.36 \times 10^{-10}$   | 27(16), 20235-20245.                                            |
| TBIM     | 8.12             | $1.16 \times 10^4$ | $1.29 \times 10^{-10}$   | <i>J. Mater. Chem. A</i> , 2020, 8,<br>2820–2826.               |
| TTPTh    | 564.97           | $1.20 \times 10^4$ | $1.74 \times 10^{-8}$    | <i>This work.</i>                                               |
| DBTh     | 416.99           | $4.52 \times 10^4$ | $3.32 \times 10^{-12}$   |                                                                 |
| TBTh     | 521.30           | $3.15 \times 10^3$ | $1.66 \times 10^{-9}$    |                                                                 |

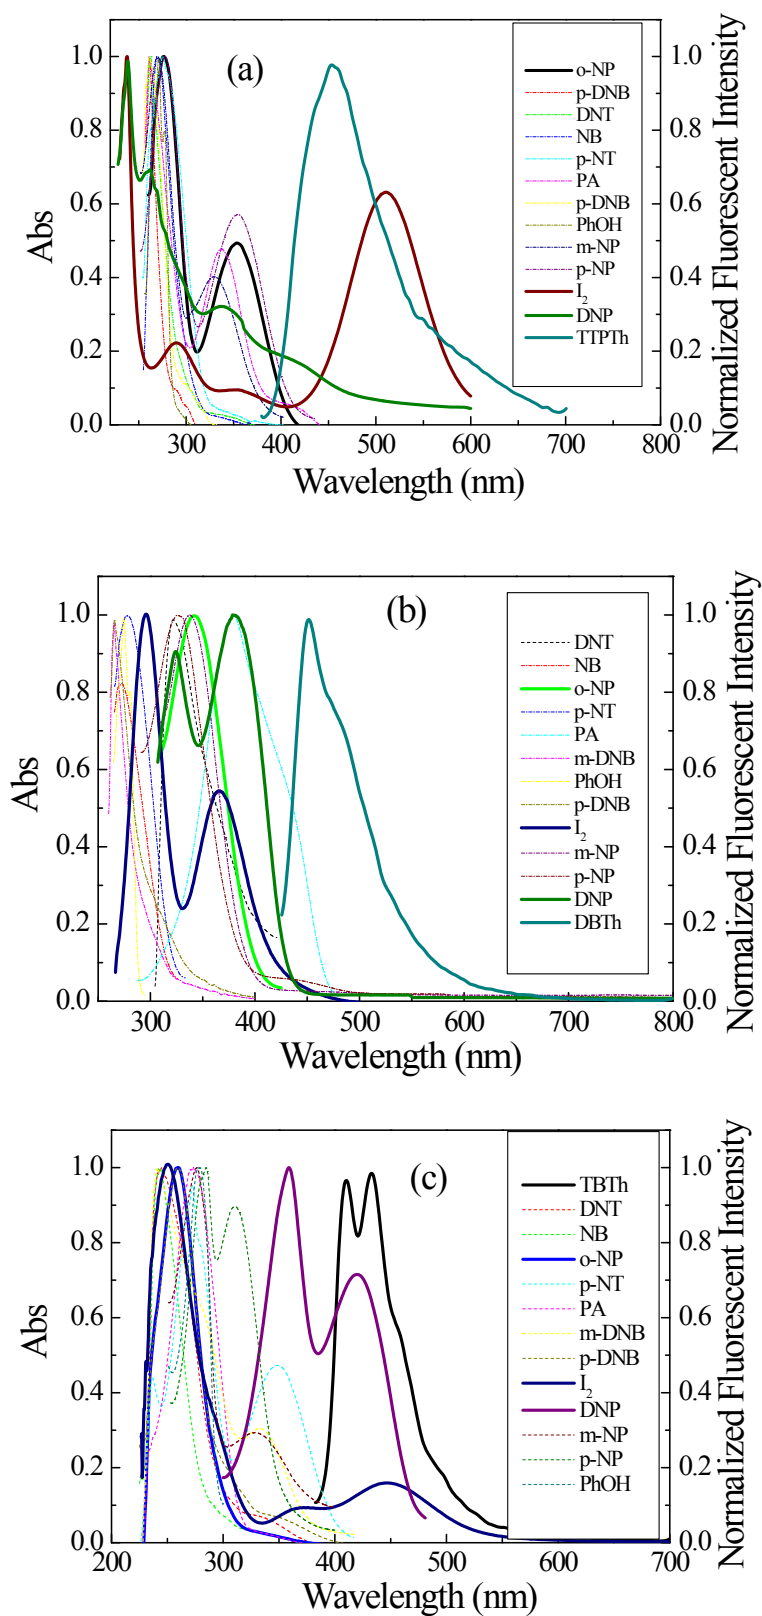

**Fig. S13.** Normalized absorption spectra of analytes and emission spectra of (a) TTPTh in chloroform (excitation wavelength: 360 nm), (b) DBTh in DMF (excitation wavelength: 410 nm), and (c) TBTh in THF (excitation wavelength: 362 nm).

**Table S5.** HOMO and LUMO calculations for CMPs, NACs and I<sub>2</sub>. All the molecular orbital calculations were performed with the Gaussian 09 D.01 program at the B3LYP/6-31G\* level.

|                |        |        |        |                |         |
|----------------|--------|--------|--------|----------------|---------|
| MO energy (eV) | TTPTh  | DBTh   | TBTh   | I <sub>2</sub> | PA      |
| LUMO           | -1.726 | -1.255 | -2.063 | -4.988         | -3.898  |
| HOMO           | -5.424 | -6.128 | -5.628 | -7.553         | -8.273  |
| MO energy (eV) | DNP    | o-NP   | m-NP   | p-NP           | NB      |
| LUMO           | -3.320 | -2.711 | -2.396 | -2.222         | -2.428  |
| HOMO           | -7.628 | -6.797 | -6.779 | -6.721         | -7.591  |
| MO energy (eV) | m-DNB  | p-DNB  | DNT    | p-NT           | PhOH    |
| LUMO           | -3.135 | -3.495 | -2.977 | -2.318         | -0.3331 |
| HOMO           | -8.413 | -8.358 | -8.113 | -7.364         | -6.566  |

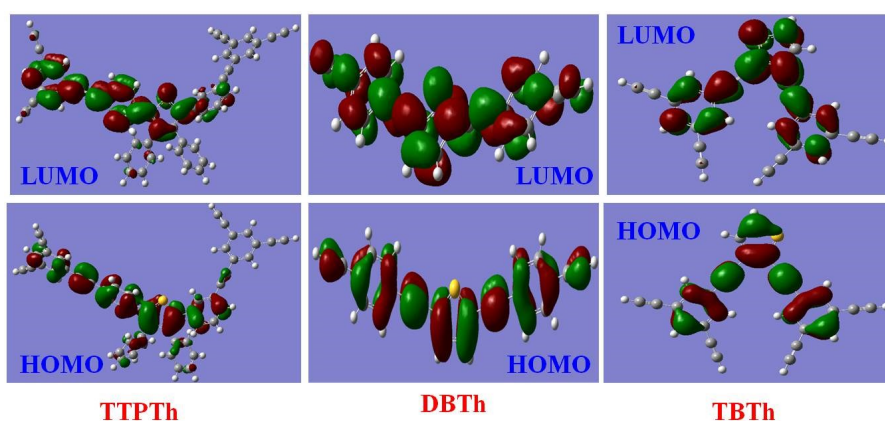

**Fig. S14.** HOMO and LUMO orbital diagrams of CMPs. The molecular orbital calculations were performed with the Gaussian 09 D.01 program at the B3LYP/6-31G(d) level.

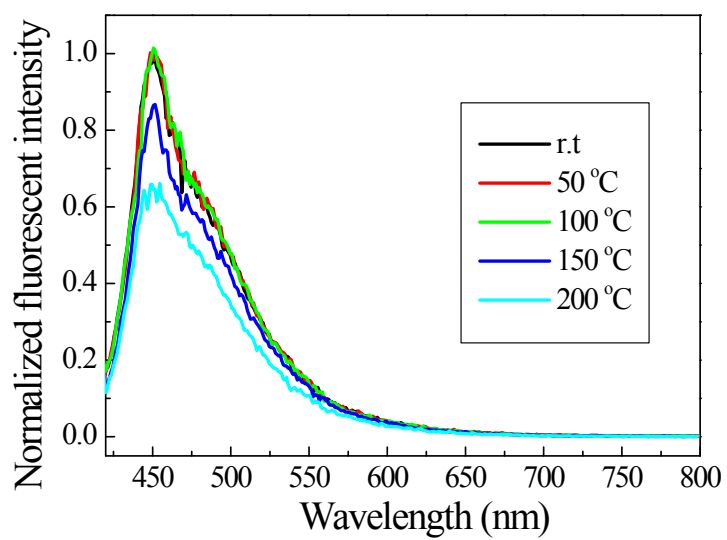

**Fig. S15.** Fluorescent spectra of DBTh before and after annealing at different temperatures for 30 min in air.



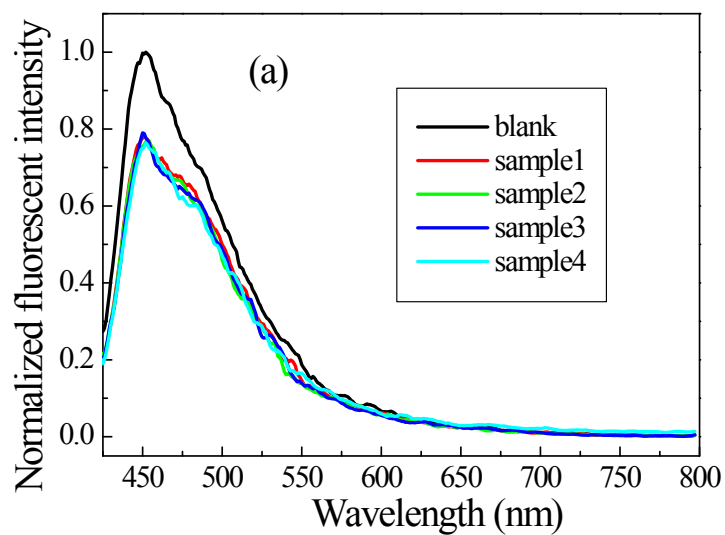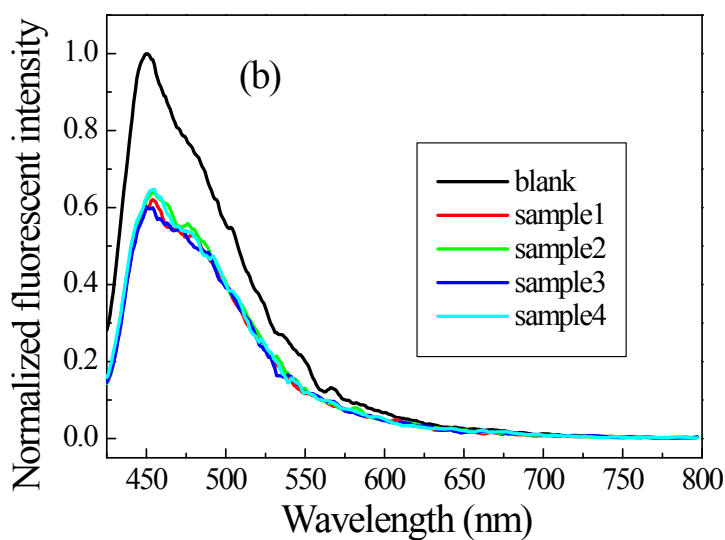

**Fig. S16.** The practical application of DBTh as a chemosensor for DNP in sand samples. The addition of DNP ( $\mu\text{mol}/5\text{g}$ ): (a) 0.125, (b) 0.250.

**Table S6.** Spiked recoveries and RSDs (% , n=4) for the determination of DNP in sand samples using the DBTh sensor.

| Added<br>( $\mu\text{mol}/5\text{g}$ ) | Added<br>( $\times 10^{-6} \text{ mol L}^{-1}$ ) | Found<br>( $\times 10^{-6} \text{ mol L}^{-1}$ ) | Found<br>( $\mu\text{mol}/5\text{g}$ ) | Recovery<br>$\pm$ RSD (%) |
|----------------------------------------|--------------------------------------------------|--------------------------------------------------|----------------------------------------|---------------------------|
| 0.125                                  | 5.0                                              | 5.10                                             | 0.127                                  | 0.122 $\pm$ 4.28          |
| 0.125                                  | 5.0                                              | 4.70                                             | 0.117                                  |                           |
| 0.125                                  | 5.0                                              | 5.045                                            | 0.126                                  |                           |
| 0.125                                  | 5.0                                              | 4.74                                             | 0.118                                  |                           |
| Added<br>( $\mu\text{mol}/5\text{g}$ ) | Added<br>( $\times 10^{-6} \text{ mol L}^{-1}$ ) | Found<br>( $\times 10^{-6} \text{ mol L}^{-1}$ ) | Found<br>( $\mu\text{mol}/5\text{g}$ ) | Recovery<br>$\pm$ RSD (%) |
| 0.250                                  | 10.0                                             | 10.512                                           | 0.263                                  | 0.246 $\pm$ 3.85          |
| 0.250                                  | 10.0                                             | 9.693                                            | 0.242                                  |                           |
| 0.250                                  | 10.0                                             | 11.326                                           | 0.283                                  |                           |
| 0.250                                  | 10.0                                             | 9.349                                            | 0.234                                  |                           |

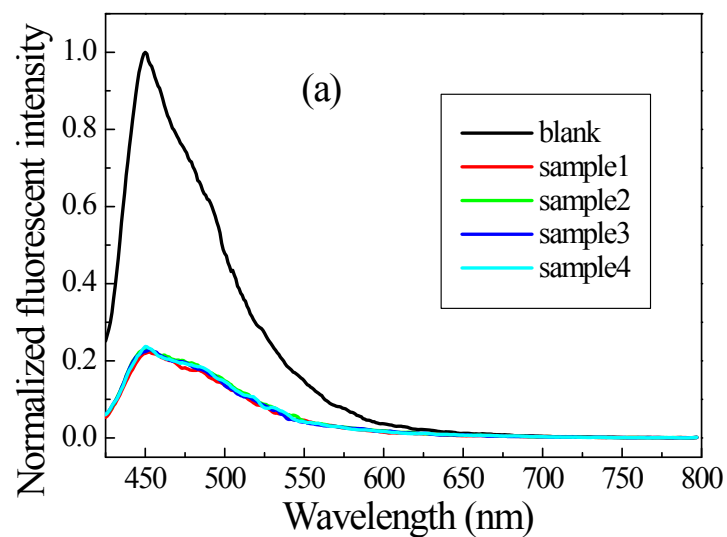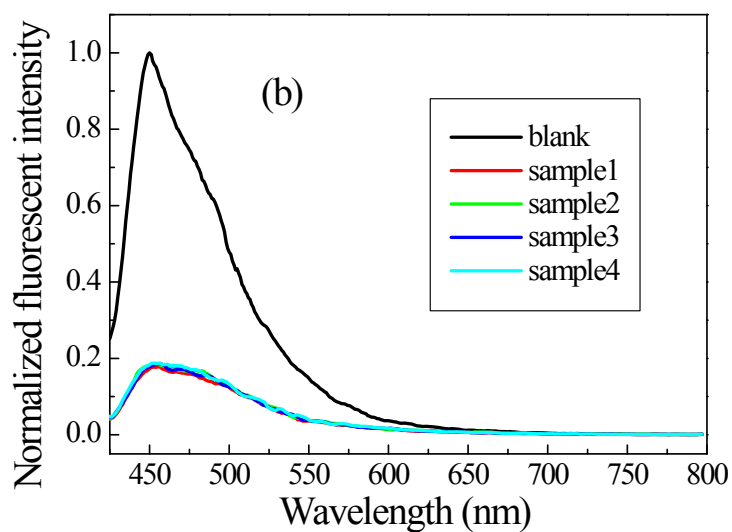

**Fig. S17.** The practical application of DBTh as a chemosensor for I<sub>2</sub> in sand samples.

The addition of I<sub>2</sub> (μmol/5g): (a) 0.025, (b) 0.050.

**Table S7.** Spiked recoveries and RSDs (%; n=4) for the determination of I<sub>2</sub> in sand samples using a DBTh sensor.

| Added<br>( $\mu\text{mol}/5\text{g}$ ) | Added<br>( $\times 10^{-6} \text{ mol L}^{-1}$ ) | Found<br>( $\times 10^{-6} \text{ mol L}^{-1}$ ) | Found<br>( $\mu\text{mol}/5\text{g}$ ) | Recovery<br>$\pm$ RSD (%) |
|----------------------------------------|--------------------------------------------------|--------------------------------------------------|----------------------------------------|---------------------------|
| 0.025                                  | 1.0                                              | 0.852                                            | 0.0213                                 | 0.0234 $\pm$ 3.94         |
| 0.025                                  | 1.0                                              | 0.954                                            | 0.0238                                 |                           |
| 0.025                                  | 1.0                                              | 1.082                                            | 0.0271                                 |                           |
| 0.025                                  | 1.0                                              | 0.863                                            | 0.0216                                 |                           |
| Added<br>( $\mu\text{mol}/5\text{g}$ ) | Added<br>( $\times 10^{-6} \text{ mol L}^{-1}$ ) | Found<br>( $\times 10^{-6} \text{ mol L}^{-1}$ ) | Found<br>( $\mu\text{mol}/5\text{g}$ ) | Recovery<br>$\pm$ RSD (%) |
| 0.050                                  | 2.0                                              | 1.619                                            | 0.0405                                 | 0.0468 $\pm$ 3.53         |
| 0.050                                  | 2.0                                              | 1.387                                            | 0.0347                                 |                           |
| 0.050                                  | 2.0                                              | 1.994                                            | 0.0498                                 |                           |
| 0.050                                  | 2.0                                              | 1.949                                            | 0.0487                                 |                           |
